# Supplementary material
Source: MDPI journal article supplement (https://www.mdpi.com/1999-4907/8/1/19)
Supplement: s1 [file s1]

## Sheet: Table.1_forests
Table S1. Correlation matrix with Spearman's rho coefficients to test the correlation between chemical soil parameters (dataset: n = 123, includes data of four forest soils in Germany)
	pH	Al_ox	Fe_ox	Mn_ox	P_ox	Al_di	Fe_di	Mn_di	N	C	CN	Pi_resin	Pi_NaHCO3	Pi_NaOH	Pi_1M.HCl	Pi_conc.HCl	Po_NaHCO3	Po_NaOH	Po_1M.HCl	Po_conc.HCl	Pt_NaHCO3	Pt_NaOH	Pt_1M.HCl	Pt_conc.HCl	Pt_residual	TP_initial	TP_sum	C.TP	C.Porg	Porg	Pinorg	Po.Pi	labile.P	mod_labile.P	stable.P	labile.Po	labile.Pi	mod_labile.Po	mod_labile.Pi	stable.Po	stable.Pi
pH	1
Al_ox	0.561844	1
Fe_ox	0.416624	0.749052	1
Mn_ox	0.564959	0.840841	0.862078	1
P_ox	0.382561	0.808095	0.90504	0.881059	1
Al_di	0.559904	0.948756	0.842641	0.880361	0.857177	1
Fe_di	0.512451	0.777801	0.9466	0.857001	0.848191	0.867262	1
Mn_di	0.573738	0.835236	0.790963	0.961767	0.8468	0.868285	0.844297	1
N	-0.200106	0.21301	0.48055	0.425447	0.555915	0.283759	0.336934	0.35689	1
C	-0.268306	0.162449	0.441584	0.376514	0.518567	0.230904	0.286926	0.301206	0.993592	1
CN	-0.57875	-0.604345	-0.551155	-0.645348	-0.578227	-0.625182	-0.654933	-0.693914	ns	ns	1
Pi_resin	-0.185475	ns	0.181745	0.286551	0.420863	0.150891	ns	0.311527	0.828675	0.823286	ns	1
Pi_NaHCO3	ns	0.438014	0.43131	0.48586	0.621237	0.434102	0.370993	0.493654	0.755221	0.719968	-0.241423	0.787759	1
Pi_NaOH	0.700865	0.890083	0.68886	0.813022	0.75245	0.916883	0.775023	0.863809	ns	ns	-0.735746	ns	0.312407	1
Pi_1M HCl	0.482063	0.747638	0.831557	0.835316	0.927656	0.798689	0.828349	0.83462	0.368296	0.325177	-0.623319	0.333944	0.529616	0.789888	1
Pi_conc HCl	0.558326	0.610104	0.734172	0.676916	0.545531	0.717537	0.814711	0.642672	ns	ns	-0.587912	ns	ns	0.685064	0.575464	1
Po_NaHCO3	ns	0.291392	0.618891	0.493559	0.675079	0.381288	0.484907	0.423878	0.942303	0.930389	-0.1784	0.746008	0.701598	0.157239	0.497794	0.234748	1
Po_NaOH	0.245969	0.572875	0.876773	0.754978	0.912054	0.688872	0.754891	0.672198	0.666547	0.635243	-0.407009	0.43972	0.581069	0.564263	0.821453	0.517757	0.777193	1
Po_1M HCl	ns	ns	0.476489	0.355754	0.360463	0.255777	0.412722	0.282524	0.591124	0.576102	ns	0.33723	0.265865	0.193404	0.272174	0.424418	0.596841	0.515223	1
Po_conc HCl	ns	ns	0.236274	ns	ns	ns	ns	ns	0.619622	0.608555	ns	0.301525	0.306473	ns	ns	0.38244	0.55954	0.278381	0.49599	1
Pt_NaHCO3	ns	0.309617	0.593702	0.497357	0.668373	0.381411	0.462926	0.435285	0.954246	0.936837	-0.167429	0.79484	0.790695	0.162274	0.498965	0.197053	0.979374	0.763667	0.568001	0.552759	1
Pt_NaOH	0.436708	0.780927	0.888366	0.855044	0.965017	0.857896	0.815953	0.807664	0.484597	0.442355	-0.5233	0.33492	0.526948	0.794593	0.900098	0.589593	0.605684	0.926666	0.404587	ns	0.596762	1
Pt_1M HCl	0.464164	0.722576	0.826431	0.830701	0.928802	0.780977	0.813677	0.825069	0.406091	0.363296	-0.611781	0.364643	0.553087	0.782519	0.988834	0.581207	0.527749	0.835768	0.352426	ns	0.530318	0.905311	1
Pt_conc HCl	0.363384	0.441542	0.606588	0.541093	0.395613	0.531496	0.641124	0.469167	0.281839	0.241642	-0.391376	ns	ns	0.470195	0.377686	0.907274	0.319706	0.42309	0.489438	0.688664	0.288783	0.432593	0.3981	1
Pt_residual	0.301729	0.523196	0.819442	0.725828	0.790374	0.617241	0.734912	0.660329	0.692313	0.649992	-0.415661	0.449862	0.57427	0.51417	0.729088	0.541672	0.737048	0.867357	0.545158	0.394358	0.756879	0.803242	0.731103	0.511021	1
TP_initial	0.254416	0.591015	0.800372	0.716415	0.856346	0.682962	0.69547	0.653915	0.743776	0.703519	-0.378198	0.539409	0.675465	0.588703	0.760498	0.483652	0.795075	0.92062	0.563569	0.343133	0.817316	0.88609	0.781403	0.428514	0.895593	1
TP_sum	0.307896	0.644024	0.838886	0.749066	0.90536	0.739952	0.73602	0.690816	0.67213	0.630881	-0.421776	0.476039	0.629962	0.659472	0.820305	0.532626	0.756471	0.940534	0.55152	0.299994	0.763212	0.941273	0.841246	0.448446	0.882305	0.974397	1
C/TP	-0.715282	-0.559442	-0.18606	-0.339328	-0.19071	-0.492136	-0.352428	-0.429793	0.600888	0.655235	0.700313	0.465197	0.186636	-0.640581	-0.305343	-0.421482	0.504169	ns	0.29455	0.397572	0.499735	-0.192721	-0.269317	-0.183983	ns	ns	ns	1
C/Po	-0.678944	-0.775302	-0.531887	-0.590409	-0.523019	-0.747038	-0.629822	-0.613787	0.303638	0.35753	0.712295	0.300999	ns	-0.796962	-0.594718	-0.621879	0.199676	-0.331985	ns	0.187771	0.203917	-0.525699	-0.570181	-0.397144	-0.226951	-0.23163	-0.324937	0.841298	1
Po	0.159616	0.460679	0.829174	0.678678	0.847699	0.596124	0.701073	0.596777	0.784396	0.755203	-0.341504	0.53381	0.62816	0.47081	0.746103	0.481828	0.867017	0.969284	0.643861	0.394756	0.857181	0.857838	0.77444	0.446237	0.882323	0.938967	0.935544	0.18727	-0.187169	1
Pi	0.653471	0.820912	0.77613	0.857005	0.813121	0.862163	0.81246	0.862778	0.357033	0.296207	-0.630018	0.288755	0.523581	0.873775	0.836905	0.683607	0.380476	0.706129	0.376338	ns	0.423655	0.841904	0.833832	0.551029	0.783406	0.78226	0.812642	-0.37723	-0.612539	0.659025	1
Po/Pi	-0.543981	-0.182764	0.273389	ns	0.292322	ns	ns	ns	0.741492	0.770099	0.241982	0.521605	0.388143	-0.257836	ns	ns	0.789714	0.528998	0.413457	0.510426	0.740436	0.266718	0.192596	ns	0.368616	0.416315	0.385097	0.69724	0.370944	0.613507	ns	1
labile P	-0.20907	ns	0.419328	0.325352	0.508092	0.185963	0.267812	0.254888	0.978502	0.972592	ns	0.840217	0.764241	ns	0.406903	ns	0.947441	0.679961	0.534051	0.579541	0.97839	0.507463	0.438649	0.237117	0.693359	0.754779	0.68891	0.557499	0.275051	0.784669	0.366932	0.724652	1
mod_labile P	0.437068	0.783409	0.887825	0.854994	0.96585	0.857009	0.818756	0.808912	0.478104	0.436304	-0.528873	0.338951	0.528091	0.79674	0.910337	0.588831	0.599386	0.923511	0.404948	ns	0.591477	0.998218	0.917085	0.428057	0.799273	0.882789	0.939264	-0.198075	-0.533329	0.854683	0.843306	0.26415	0.501732	1
stable P	0.467174	0.571161	0.860578	0.763203	0.740527	0.693075	0.833483	0.693052	0.560183	0.509196	-0.50601	0.268519	0.435897	0.609153	0.700237	0.777162	0.624039	0.798074	0.644499	0.481959	0.622469	0.771183	0.710446	0.746083	0.92266	0.819375	0.824167	ns	-0.367031	0.817806	0.823371	0.245332	0.541639	0.767012	1
labile Po	ns	0.291392	0.618891	0.493559	0.675079	0.381288	0.484907	0.423878	0.942303	0.930389	-0.1784	0.746008	0.701598	0.157239	0.497794	0.234748	1	0.777193	0.596841	0.55954	0.979374	0.605684	0.527749	0.319706	0.737048	0.795075	0.756471	0.504169	0.199676	0.867017	0.380476	0.789714	0.947441	0.599386	0.624039	1
labile Pi	ns	0.311416	0.331987	0.414792	0.532357	0.320664	0.258173	0.418195	0.858238	0.841915	ns	0.915665	0.924942	0.209916	0.443872	ns	0.762439	0.536191	0.347352	0.371579	0.825125	0.452324	0.467891	ns	0.536968	0.631732	0.576543	0.341216	ns	0.609967	0.438667	0.468136	0.85662	0.452125	0.391233	0.762439	1
mod_labile Po	0.23612	0.562129	0.872265	0.750619	0.907781	0.680521	0.748459	0.667327	0.677246	0.646385	-0.401084	0.450053	0.58642	0.556341	0.814138	0.513618	0.783754	0.998728	0.540295	0.287994	0.771143	0.921952	0.832746	0.424953	0.86673	0.923281	0.941279	ns	-0.320304	0.974119	0.70143	0.540672	0.688628	0.919566	0.798503	0.783754	0.543044	1
mod_labile Pi	0.696847	0.890185	0.766274	0.878029	0.836726	0.922899	0.834428	0.918927	0.156436	ns	-0.734572	0.157408	0.387069	0.977621	0.880525	0.682971	0.262001	0.66312	0.232057	ns	0.269652	0.859211	0.869048	0.465263	0.620103	0.667558	0.733932	-0.566167	-0.75588	0.57234	0.913942	-0.162948	0.186927	0.86335	0.681766	0.262001	0.287027	0.655093	1
stable Po	ns	ns	0.236274	ns	ns	ns	ns	ns	0.619622	0.608555	ns	0.301525	0.306473	ns	ns	0.38244	0.55954	0.278381	0.49599	1	0.552759	ns	ns	0.688664	0.394358	0.343133	0.299994	0.397572	0.187771	0.394756	ns	0.510426	0.579541	0.119742	0.481959	0.55954	0.371579	ns	ns	1
stable Pi	0.531009	0.632293	0.887368	0.809383	0.759438	0.737999	0.878949	0.744845	0.475288	0.422594	-0.565265	0.19946	0.383868	0.664608	0.738686	0.815019	0.549982	0.778394	0.576765	0.406971	0.547905	0.781892	0.740284	0.750628	0.901389	0.788682	0.801033	-0.183101	-0.451049	0.772748	0.857951	0.158263	0.46247	0.779713	0.98499	0.549982	0.328457	0.776207	0.735353	0.406971	1
	ns - not significant, d.h. p > 0.1
	p	< 0.01
		0.01–0.05
		0.05–0.1

## Sheet: Table.2_forests
Table S2. Results (p-values) of the non-parametric Wilcoxon rank-sum test for differences between PFPs and soil matrix samples (pair-wise test for all data per site)
Site	LUE	VES	MIT	BBR
pH	> 0.1	> 0.1	> 0.1	> 0.1
Al_ox	> 0.1	> 0.1	> 0.1	> 0.1
Fe_ox	0.03125	> 0.1	> 0.1	> 0.1
Mn_ox	0.03125	0.0310325	0.0355223	> 0.1
P_ox	> 0.1	> 0.1	> 0.1	> 0.1
Al_di	0.09375	> 0.1	> 0.1	> 0.1
Fe_di	> 0.1	> 0.1	0.03125	> 0.1
Mn_di	0.0625	> 0.1	> 0.1	> 0.1
N	> 0.1	> 0.1	0.09375	0.0141474
C	> 0.1	0.0084333	0.09375	0.0078125
CN	> 0.1	0.0084333	> 0.1	> 0.1
Pi_resin	> 0.1	> 0.1	0.09375	> 0.1
Pi_NaHCO3	0.09375	> 0.1	> 0.1	> 0.1
Pi_NaOH	> 0.1	> 0.1	> 0.1	> 0.1
Pi_1M HCl	> 0.1	> 0.1	> 0.1	> 0.1
Pi_conc HCl	> 0.1	> 0.1	> 0.1	> 0.1
Po_NaHCO3	> 0.1	> 0.1	0.09375	0.0078125
Po_NaOH	> 0.1	> 0.1	> 0.1	> 0.1
Po_1M HCl	> 0.1	> 0.1	0.09375	> 0.1
Po_conc HCl	> 0.1	> 0.1	> 0.1	0.015625
Pt_NaHCO3	> 0.1	> 0.1	0.09375	> 0.1
Pt_NaOH	0.09375	> 0.1	> 0.1	> 0.1
Pt_1M HCl	> 0.1	> 0.1	> 0.1	> 0.1
Pt_conc HCl	0.09375	> 0.1	> 0.1	> 0.1
Pt_residual	> 0.1	0.0625	> 0.1	0.015625
TP_initial	> 0.1	> 0.1	> 0.1	> 0.1
TP_sum	0.0625	> 0.1	> 0.1	> 0.1
C/TP	> 0.1	0.0345097	> 0.1	0.0078125
C/Po	> 0.1	0.03125	> 0.1	0.0546875
Po	> 0.1	> 0.1	> 0.1	> 0.1
Pi	> 0.1	> 0.1	0.0625	> 0.1
Po/Pi	> 0.1	> 0.1	> 0.1	> 0.1
labile P	> 0.1	> 0.1	> 0.1	> 0.1
mod_labile P	0.0625	> 0.1	> 0.1	> 0.1
stable P	> 0.1	> 0.1	> 0.1	0.015625
labile Po	> 0.1	> 0.1	0.09375	0.0078125
labile Pi	0.09375	> 0.1	> 0.1	> 0.1
mod_labile Po	> 0.1	> 0.1	> 0.1	> 0.1
mod_labile Pi	> 0.1	> 0.1	> 0.1	> 0.1
stable Po	> 0.1	> 0.1	> 0.1	0.015625
stable Pi	> 0.1	> 0.1	> 0.1	0.015625
sum of significant results	10	6	10	11
sum of p < 0.01	0	2	0	4
sum of p 0.01–0.05	2	3	2	6
sum of p 0.05–0.1	8	1	8	1
sum of p > 0.1 (not significant)	31	35	31	30

## Sheet: Table.3_forests
Table S3. Results (p-values) of the non-parametric Wilcoxon rank-sum test for differences between PFPs and soil matrix samples (pair-wise test at horizon level per sites)
Site	LUE			VES			MIT			BBR
Horizon	A	B	C	A	B	C	A	B	C	A	B	C
pH	> 0.1	> 0.1	> 0.1	> 0.1	> 0.1	NA	> 0.1	> 0.1	NA	> 0.1	> 0.1	> 0.1
Al_ox	> 0.1	> 0.1	> 0.1	> 0.1	> 0.1	NA	> 0.1	> 0.1	NA	> 0.1	> 0.1	> 0.1
Fe_ox	> 0.1	> 0.1	> 0.1	> 0.1	> 0.1	NA	> 0.1	> 0.1	NA	> 0.1	> 0.1	> 0.1
Mn_ox	NA	> 0.1	> 0.1	> 0.1	> 0.1	NA	> 0.1	> 0.1	NA	> 0.1	> 0.1	> 0.1
P_ox	NA	NA	NA	> 0.1	> 0.1	NA	> 0.1	> 0.1	NA	> 0.1	> 0.1	> 0.1
Al_di	> 0.1	> 0.1	> 0.1	> 0.1	> 0.1	NA	> 0.1	> 0.1	NA	> 0.1	> 0.1	> 0.1
Fe_di	> 0.1	> 0.1	> 0.1	> 0.1	> 0.1	NA	> 0.1	> 0.1	NA	> 0.1	> 0.1	> 0.1
Mn_di	NA	> 0.1	> 0.1	> 0.1	> 0.1	NA	> 0.1	> 0.1	NA	> 0.1	> 0.1	> 0.1
N	NA	> 0.1	> 0.1	> 0.1	> 0.1	NA	> 0.1	> 0.1	NA	> 0.1	> 0.1	> 0.1
C	> 0.1	> 0.1	> 0.1	> 0.1	> 0.1	NA	> 0.1	> 0.1	NA	> 0.1	> 0.1	> 0.1
CN	> 0.1	> 0.1	> 0.1	> 0.1	> 0.1	NA	> 0.1	> 0.1	NA	> 0.1	> 0.1	> 0.1
Pi_resin	> 0.1	> 0.1	> 0.1	> 0.1	> 0.1	NA	> 0.1	> 0.1	NA	> 0.1	> 0.1	> 0.1
Pi_NaHCO3	> 0.1	> 0.1	> 0.1	> 0.1	> 0.1	NA	> 0.1	> 0.1	NA	> 0.1	> 0.1	> 0.1
Pi_NaOH	> 0.1	> 0.1	> 0.1	> 0.1	> 0.1	NA	> 0.1	> 0.1	NA	> 0.1	> 0.1	> 0.1
Pi_1M HCl	> 0.1	> 0.1	> 0.1	> 0.1	> 0.1	NA	> 0.1	> 0.1	NA	> 0.1	> 0.1	> 0.1
Pi_conc HCl	> 0.1	> 0.1	> 0.1	> 0.1	> 0.1	NA	> 0.1	> 0.1	NA	> 0.1	> 0.1	> 0.1
Po_NaHCO3	> 0.1	> 0.1	> 0.1	> 0.1	> 0.1	NA	> 0.1	> 0.1	NA	> 0.1	> 0.1	> 0.1
Po_NaOH	> 0.1	> 0.1	> 0.1	> 0.1	> 0.1	NA	> 0.1	> 0.1	NA	> 0.1	> 0.1	> 0.1
Po_1M HCl	> 0.1	> 0.1	> 0.1	NA	NA	NA	> 0.1	> 0.1	NA	> 0.1	> 0.1	> 0.1
Po_conc HCl	> 0.1	> 0.1	NA	> 0.1	> 0.1	NA	> 0.1	> 0.1	NA	> 0.1	> 0.1	> 0.1
Pt_NaHCO3	> 0.1	> 0.1	> 0.1	> 0.1	> 0.1	NA	> 0.1	> 0.1	NA	> 0.1	> 0.1	> 0.1
Pt_NaOH	> 0.1	> 0.1	> 0.1	> 0.1	> 0.1	NA	> 0.1	> 0.1	NA	> 0.1	> 0.1	> 0.1
Pt_1M HCl	> 0.1	> 0.1	> 0.1	> 0.1	> 0.1	NA	> 0.1	> 0.1	NA	> 0.1	> 0.1	> 0.1
Pt_conc HCl	> 0.1	> 0.1	> 0.1	> 0.1	> 0.1	NA	> 0.1	> 0.1	NA	> 0.1	> 0.1	> 0.1
Pt_residual	> 0.1	> 0.1	> 0.1	> 0.1	> 0.1	NA	> 0.1	> 0.1	NA	> 0.1	> 0.1	> 0.1
TP_initial	> 0.1	> 0.1	> 0.1	> 0.1	> 0.1	NA	> 0.1	> 0.1	NA	> 0.1	> 0.1	> 0.1
TP_sum	> 0.1	> 0.1	> 0.1	> 0.1	> 0.1	NA	> 0.1	> 0.1	NA	> 0.1	> 0.1	> 0.1
C/TP	> 0.1	> 0.1	> 0.1	> 0.1	> 0.1	NA	> 0.1	> 0.1	NA	> 0.1	> 0.1	> 0.1
C/Po	> 0.1	> 0.1	> 0.1	> 0.1	> 0.1	NA	> 0.1	> 0.1	NA	> 0.1	> 0.1	> 0.1
Po	> 0.1	> 0.1	> 0.1	> 0.1	> 0.1	NA	> 0.1	> 0.1	NA	> 0.1	> 0.1	> 0.1
Pi	> 0.1	> 0.1	> 0.1	> 0.1	> 0.1	NA	> 0.1	> 0.1	NA	> 0.1	> 0.1	> 0.1
Po/Pi	> 0.1	> 0.1	> 0.1	> 0.1	> 0.1	NA	> 0.1	> 0.1	NA	> 0.1	> 0.1	> 0.1
labile P	> 0.1	> 0.1	> 0.1	> 0.1	> 0.1	NA	> 0.1	> 0.1	NA	> 0.1	> 0.1	> 0.1
mod_labile P	> 0.1	> 0.1	> 0.1	> 0.1	> 0.1	NA	> 0.1	> 0.1	NA	> 0.1	> 0.1	> 0.1
stable P	> 0.1	> 0.1	> 0.1	> 0.1	> 0.1	NA	> 0.1	> 0.1	NA	> 0.1	> 0.1	> 0.1
labile Po	> 0.1	> 0.1	> 0.1	> 0.1	> 0.1	NA	> 0.1	> 0.1	NA	> 0.1	> 0.1	> 0.1
labile Pi	> 0.1	> 0.1	> 0.1	> 0.1	> 0.1	NA	> 0.1	> 0.1	NA	> 0.1	> 0.1	> 0.1
mod_labile Po	> 0.1	> 0.1	> 0.1	> 0.1	> 0.1	NA	> 0.1	> 0.1	NA	> 0.1	> 0.1	> 0.1
mod_labile Pi	> 0.1	> 0.1	> 0.1	> 0.1	> 0.1	NA	> 0.1	> 0.1	NA	> 0.1	> 0.1	> 0.1
stable Po	> 0.1	> 0.1	> 0.1	> 0.1	> 0.1	NA	> 0.1	> 0.1	NA	> 0.1	> 0.1	> 0.1
stable Pi	> 0.1	> 0.1	> 0.1	> 0.1	> 0.1	NA	> 0.1	> 0.1	NA	> 0.1	> 0.1	> 0.1
sum of significant results	0	0	0	0	0	0	0	0	0	0	0	0
p > 0.1 no significant differences
NA - no paired data available
